# Supplementary material for: Ambient Temperature and Stroke Occurrence: A Systematic Review and Meta-Analysis
Source: Int J Environ Res Public Health. 2016 Jul 12;13(7):698. doi: 10.3390/ijerph13070698 (PMC4962239; doi:10.3390/ijerph13070698)
Supplement: Supplementary file 1 [file ijerph-13-00698-s001.pdf]

# Supplementary Materials: Ambient Temperature and Stroke Occurrence: A Systematic Review and Meta-Analysis

Xia Wang, Yongjun Cao, Daqing Hong, Danni Zheng, Sarah Richtering, Else Charlotte Sandset, Tzen Hugh Leong, Hisatomi Arima, Shariful Islam, Abdul Salam, Craig Anderson Thompson Robinson and Maree L. Hackett

## Supplementary Material: Search Strategy

### MEDLINE

#### Stroke

cerebrovascular disorders/ or exp basal ganglia cerebrovascular disease/ or exp brain ischemia/ or exp carotid artery diseases/ or exp intracranial arterial diseases/ or exp intracranial arteriovenous malformations/ or exp "intracranial embolism and thrombosis"/ or exp intracranial hemorrhages/ or stroke/ or exp brain infarction/ or vasospasm, intracranial/ or vertebral artery dissection/

(stroke\$ or poststroke or post-stroke or cerebrovasc\$ or brain vasc\$ or cerebral vasc\$ or cva\$ or apoplex\$ or SAH).tw.

((brain\$ or cerebr\$ or cerebell\$ or intracran\$ or intracerebral) adj3 (isch?emi\$ or infarct\$ or thrombo\$ or emboli\$ or occlus\$)).tw.

((brain\$ or cerebr\$ or cerebell\$ or intracerebral or intracranial or subarachnoid) adj3 (h?emorrhag\$ or h?ematoma\$ or bleed\$)).tw.

exp paresis/ or exp Gait Disorders, Neurologic/

(hemipleg\$ or hemipar\$ or pares?s or paretic).tw.

1 or 2 or 3 or 4 or 5 or 6

#### Weather

exp weather/ or exp climate/ or exp meteorological concepts/

weather or climate

(climat\$ or season\$ or humid\$ or latitud\$).tw.

(temperature\$ adj3 (hot\$ or cold\$ or ambient or extreme\$ or atmospher\$ or variation\$ or chang\$ or absolute or range\$ or fall\$ or rise\$ or fluctuat\$)).tw

((atmospher\$ or air or barometric) adj3 pressur\$).tw

(snow\$ or sun\$ or rain\$ or freez\$ or precipitation\$ or meteorolog\$).tw.

8 or 9 or 10 or 11 or 12 or 13

#### Study type

Epidemiologic studies/or Exp case control studies/ or Exp cohort studies/ or Case control.tw. or (cohort adj (study or studies)).tw. or Cohort analy\$.tw. or (Follow up adj (study or studies)).tw. or (observational adj (study or studies)).tw. or Longitudinal.tw. or Retrospective.tw. or Cross sectional.tw. or Cross-sectional studies/

Human/

7 and 14 and 15 and 16

## EMBASE

Stroke

'cerebrovascular disease' or 'basal ganglion hemorrhage'/exp or 'brain hematoma'/exp or 'brain hemorrhage'/exp or 'brain infarction'/exp or 'brain ischemia'/exp or 'carotid artery disease'/exp or 'cerebral artery disease' or 'cerebrovascular accident'/exp or 'intracranial aneurysm'/exp or 'occlusive cerebrovascular disease'/exp or 'stroke unit' or 'stroke patient' (stroke\$ or poststroke or post-stroke or cerebrovasc\$ or brain vasc\$ or cerebral vasc\$ or cva\$ or apoplex\$ or SAH):ab or (stroke\$ or poststroke or post-stroke or cerebrovasc\$ or brain vasc\$ or cerebral vasc\$ or cva\$ or apoplex\$ or SAH):ti

((brain\$ or cerebr\$ or cerebell\$ or intracran\$ or intracerebral) near/3 (isch?emi\$ or infarct\$ or thrombo\$ or emboli\$ or oclus\$)):ti or ((brain\$ or cerebr\$ or cerebell\$ or intracran\$ or intracerebral) near/3 (isch?emi\$ or infarct\$ or thrombo\$ or emboli\$ or oclus\$)):ab

((brain\$ or cerebr\$ or cerebell\$ or intracerebral or intracranial or subarachnoid) near/3 (h?emorrhag\$ or h?ematoma\$ or bleed\$)):ti or ((brain\$ or cerebr\$ or cerebell\$ or intracerebral or intracranial or subarachnoid) near/5 (h?emorrhag\$ or h?ematoma\$ or bleed\$)):ab

'paresis'/exp or 'neurologic gait disorder'/exp

(hemipleg\$ or hemipar\$ or paresis or pareses or paretic):ab or (hemipleg\$ or hemipar\$ or paresis or pareses or paretic):ti

1 or 2 or 3 or 4 or 5 or 6

Weather

'weather'/exp or 'climate'/exp or 'season'/exp or 'air temperature'/exp or 'environmental temperature'/exp or 'high temperature'/exp or 'low temperature'/exp or 'atmospheric pressure'/exp or 'humidity'/exp or weather or climate or meteorological phenomena

(climat\$ or season\$ or humid\$ or latitud\$):ab or (climat\$ or season\$ or humid\$ or latitud\$):ti

(temperature\$ near/3 (hot\$ or cold\$ or ambient or extreme\$ or atmospher\$ or variation\$ or chang\$ or absolute or range\$ or fall\$ or rise\$ or fluctuat\$)):ab or (temperature\$ near/3 (hot\$ or cold\$ or ambient or extreme\$ or atmospher\$ or variation\$ or chang\$ or absolute or range\$ or fall\$ or rise\$ or fluctuat\$)):ti

((atmospher\$ or air or barometric) near/3 pressure):ab or ((atmospher\$ or air or barometric) near/3 pressure):ti

(snow\$ or sun\$ or rain\$ or freez\$ or precipitation\$ or meteorolog\$):ab or (snow\$ or sun\$ or rain\$ or freez\$ or precipitation\$ or meteorolog\$):ti

8 or 9 or 10 or 11 or 12

Study type

‘clinical study’ or ‘case control study’ or ‘family study’ or ‘longitudinal study’ or ‘retrospective study’

‘prospective study’ not ‘randomized controlled trials’

‘cohort’

Cohort near (analysis or study or studies)

(Case control near (study or studies)):ab or (Case control near (study or studies)):ti

(follow up near (study or studies)):ab or (follow up near (study or studies)):ti

(observational near (study or studies)):ab or (observational near (study or studies)):ti

(epidemiologic\$ near (study or studies)):ab or (epidemiologic\$ near (study or studies)):ti

(cross sectional near (study or studies)):ab or (cross sectional near (study or studies)):ti

14 or 15 or 16 or or 17 or 18 or 19 or 20 or 21 or 22

**CINAHL**

Stroke

Cerebrovascular Disorders OR (MH “Basal Ganglia Cerebrovascular Disease+”) OR (MH “Carotid Artery Diseases+”) OR (MH “Cerebral Ischemia+”) OR (MH “Arteriovenous Malformations+”) OR (MH “Cerebral Vasospasm”) OR (MH “Intracranial Arterial Diseases+”) OR (MH “Intracranial Embolism and Thrombosis+”) OR (MH “Intracranial Hemorrhage+”) OR (MH “Stroke+”) OR (MH “Vertebral Artery Dissections”) or (MH “Stroke Patients”) OR (MH “Stroke Units”)

TI ( stroke\* or poststroke or post-stroke or cerebrovasc\* or brain vasc\* or cerebral vasc\* or cva\* or apople\* or SAH ) or AB ( stroke\* or poststroke or post-stroke or cerebrovasc\* or brain vasc\* or cerebral vasc\* or cva\* or apople\* or SAH)

(TI ( brain or cerebr\* or cerebell\* or intracran\* or intracerebral) or AB ( brain or cerebr\* or cerebell\* or intracran\* or intracerebral )) and (TI ( ischemi\* or ischaemi\* or infarct\* or thrombo\* or emboli\* or occlus\* ) or AB ( ischemi\* or ischaemi\* or infarct\* or thrombo\* or emboli\* or occlus\*))

(TI ( brain\* or cerebr\* or cerebell\* or intracerebral or intracranial or subarachnoid) or AB ( brain\* or cerebr\* or cerebell\* or intracerebral or intracranial or subarachnoid)) and (TI ( haemorrhage\* or hemorrhage\* or haematoma\* or hematoma\* or bleed\* ) or AB ( haemorrhage\* or hemorrhage\* or haematoma\* or hematoma\* or bleed\*))

TI ( hemipleg\* or hemipar\* or paresis or pareses or paretic ) or AB ( hemipleg\* or hemipar\* or paresis or pareses or paretic)

1 or 2 or 3 or 4 or 5 or 6

Weather

(MH "Meteorological Factors+") or (MH "atmosphere+") OR (MH "Atmospheric Pressure+") or (MH "Weather+") OR (MH "Temperature+"))

(MM "Cold") OR (MM "Heat") OR (MM "Humidity") OR (MM "Rain") OR (MM "Snow") or (MM "Seasons")

AB (climat\$ or season\$ or humid\$ or latitud\$) or TI (climat\$ or season\$ or humid\$ or latitud\$)

AB (temperature\$ N3 (hot\$ or cold\$ or ambient or extreme\$ or atmospher\$ or variation\$ or chang\$ or absolute or range\$ or fall\$ or rise\$ or fluctuat\$)) or TI (temperature\$ N3 (hot\$ or cold\$ or ambient or extreme\$ or atmospher\$ or variation\$ or chang\$ or absolute or range\$ or fall\$ or rise\$ or fluctuat\$))

TI ((atmospher\$ or air or barometric) N3 pressure) or AB ((atmospher\$ or air or barometric) N3 pressure)

TI (snow\$ or sun\$ or rain\$ or freez\$ or precipitation or meteorolog\$) or AB (snow\$ or sun\$ or rain\$ or freez\$ or precipitation\$ or meteorolog\$)

7 OR 8 OR 9 OR 10 OR 11 OR 12

Study type

Prospective studies OR (MH "Case Control Studies+") or Correlational studies or Nonconcurrent prospective studies or Cross sectional studies or TI (cohort N (study or studies))

OR AB (cohort N (study or studies)) OR TI (observational N (study or studies)) OR AB (observational N (study or studies))

## Web of Science

Stroke

TS=(stroke OR cva OR cerebrovascular OR "cerebral vascular" OR hemipleg\* OR paresis OR pareses OR hemipares\* OR parapares\*)

TS=(paretic OR hemiparetic OR paraparetic OR dystoni\*)

TS=((cerebral OR cerebellar OR brain\* OR vertebrobasilar) NEAR/3 (infarct\* OR isch\$emi\* OR thrombo\* OR emboli\* OR apoplexy))

TS=((cerebral OR brain\* OR subarachnoid) NEAR/3 (haemorrhage OR haemorrhage OR haematoma OR hematoma OR bleed\*))

#4 OR #3 OR #2 OR #1

Weather

TS=(weather or climat\* or season\* or humid\* or latitud\* or snow\* or rain\* or precipitation\*)

TS=(temperature\* NEAR/3 (hot\* or cold\* or ambient or extreme\* or atmospher\* or variation\* or chang\* or absolute or range\* or fall\$ or rise\$ or fluctuat\$))

TS=((atmospher\* or air or barometric) NEAR/3 pressur\*)

#6 OR #7 OR #8

#5 and #9

## PsycINFO (Ovid)

### Stroke

cerebrovascular disorders/ or cerebral hemorrhage/ or exp cerebral ischemia/ or cerebral small vessel disease/ or cerebrovascular accidents/ or subarachnoid hemorrhage/ (stroke or poststroke or post-stroke or cerebrovasc\$ or brain vasc\$ or cerebral vasc\$ or cva\$ or apoplex\$ or SAH).tw.

((brain\$ or cerebr\$ or cerebell\$ or intracran\$ or intracerebral) adj3 (isch?emi\$ or infarct\$ or thrombo\$ or emboli\$ or occlus\$)).tw.

((brain\$ or cerebr\$ or cerebell\$ or intracerebral or intracranial or subarachnoid) adj3 (h?emorrhage\$ or h?ematoma\$ or bleed\$)).tw.

hemiparesis/ or hemiplegia/

(hemipleg\$ or hemipar\$ or paresis or paretic).tw.

or/1-6

### Weather

exp seasonal variations/ exp Atmospheric Conditions/

(weather or climat\$ or season\$ or humid\$ or latitud\$).tw.

(temperature\$ adj3 (hot\$ or cold\$ or ambient or extreme\$ or atmospher\$ or variation\$ or chang\$ or absolute or range\$ or fall\$ or rise\$ or fluctuat\$)).tw

((atmospher\$ or air or barometric) adj3 pressur\$).tw

(snow\$ or sun\$ or rain\$ or freez\$ or precipitation\$ or meteorolog\$).tw.

8 or 9 or 10 or 11 or 12 or 13

7 and 14

## Geobase

### Stroke

(([{nervous system disorder}] WN CV OR [{nervous system disorder}] WN RGI) OR ({stroke} WN CV OR {stroke} WN RGI))

((stroke\$ or poststroke or post-stroke or cerebrovasc\$ or brain vasc\$ or cerebral vasc\$ or cva\$ or apoplex\$ or SAH) WN KY)

\$brain near/3 \$ischemi or \$brain near/3 \$ischaemi or \$brain near/3 \$infarct or \$brain near/3 \$thrombo or \$brain near/3 \$emboli or \$brain near/3 \$occlus

\$cerebr near/3 \$ischemi or \$cerebr near/3 \$ischaemi or \$cerebr near/3 \$infarct or \$cerebr near/3 \$thrombo or \$cerebr near/3 \$emboli or \$cerebr near/3 \$occlus

\$cerebell near/3 \$ischemi or \$cerebell near/3 \$ischaemi or \$cerebell near/3 \$infarct or \$cerebell near/3 \$thrombo or \$cerebell near/3 \$emboli or \$cerebell near/3 \$occlus

\$intracran near/3 \$ischemi or \$intracran near/3 \$ischaemi or \$intracran near/3 \$infarct or \$intracran near/3 \$thrombo or \$intracran near/3 \$emboli or \$intracran near/3 \$occlus

intracerebral near/3 \$ischemi or intracerebral near/3 \$ischaemi or intracerebral near/3 \$infarct or intracerebral near/3 \$thrombo or intracerebral near/3 \$emboli or intracerebral near/3 \$occlus

\$brain near/3 \$hemorrhage or \$cerebr near/3 \$hemorrhage or \$cerebell near/3 \$hemorrhage or \$intracran near/3 \$hemorrhage or intracerebral near/3 \$hemorrhage

\$brain near/3 \$ hematoma or \$cerebr near/3 \$ hematoma or \$cerebell near/3 \$ hematoma or \$intracran near/3 \$ hematoma or intracerebral near/3 \$hematoma

\$brain near/3 \$bleed or \$cerebr near/3 \$bleed or \$cerebell near/3 \$bleed or \$intracran near/3 \$bleed or intracerebral near/3 \$bleed

((hemipleg\$ or hemipar\$ or pares?s or paretic or Neurologic Gait Disorders) WN KY)

Weather

((({atmospheric and meteorological phenomena} WN CV OR {atmospheric and meteorological phenomena} WN RGI) OR ({climate} WN CV OR {climate} WN RGI) OR ({weather} WN CV OR {weather} WN RGI) OR ({severe weather} WN CV OR {severe weather} WN RGI))

((weather or climat\$ or season\$ or humid\$ or latitud\$) WN KY)

((({air temperature} WN CV OR {air temperature} WN RGI))

((({atmospheric pressure} WN CV OR {atmospheric pressure} WN RGI))

((({season} WN CV OR {season} WN RGI) OR ({seasonality} WN CV OR {seasonality} WN RGI))

((snow or sun or rain or freeze or precipitation) WN KY)

**Table S1.** Meta-analysis for ambient temperature and ischemic stroke (IS).

| Temperature Variable Studied | Paper ID | Authors and Year of Publication | Number of IS Cases Reported | Statistical ANALYSIS method | Variables Controlled for in the Model       | Overall Conclusion                                                                               | Comments           |
|------------------------------|----------|---------------------------------|-----------------------------|-----------------------------|---------------------------------------------|--------------------------------------------------------------------------------------------------|--------------------|
| Daily mean temperature       | 2        | Dawson 2007                     | 5723                        | Negative binomial model     | Study year, season and day of the week      | No statistically significant association                                                         |                    |
|                              | 3        | Feigin 2000                     | 1929                        | Poisson regression          | Age, solar and geomagnetic activity, season | Statistically significant association between colder ambient temperature and first IS occurrence |                    |
|                              | 4        | Jimenez-Conde 2008              | 732                         | Logistic regression         | Atmospheric pressure and humidity           | No statistically significant association                                                         | Non-lacunar stroke |

|                           |   |                |        |                                                    |                                                                   |                                                                              |
|---------------------------|---|----------------|--------|----------------------------------------------------|-------------------------------------------------------------------|------------------------------------------------------------------------------|
| Monthly mean temperature  | 5 | Lee 2008       | 168977 | Auto-regressive integrated moving average analysis | Seasonality, month and trend                                      | No statistically significant association                                     |
|                           | 8 | Han 2015       | 2202   | Poisson generalized linear regression              | Temperature range, humidity, PM <sub>10</sub> and NO <sub>2</sub> | Statistically significant association between warmer temperature and IS risk |
| Daily minimum temperature | 2 | Dawson 2007    | 5723   | Negative binomial model                            | Study year, season and day of the week                            | No statistically significant association                                     |
|                           | 6 | Magalhaes 2011 | 348    | Poisson regression                                 | Not reported                                                      | Statistically significant association between colder temperature and IS risk |
| Daily maximum temperature | 2 | Dawson 2007    | 5723   | Negative binomial model                            | Study year, season and day of the week                            | No statistically significant association                                     |
|                           | 6 | Magalhaes 2011 | 348    | Poisson regression                                 | Not reported                                                      | Statistically significant association between colder temperature and IS risk |

**Table S2.** Studies included in systematic review of mean temperature and ischemic stroke (IS).

| Paper ID | Authors and Year of Publication | Number of IS Cases Reported | Temperature Variable Studied                                                                                            | Statistical Analysis Method         | Variables Controlled for in the Model                                                                                                    | Overall Conclusion                                                                                       |
|----------|---------------------------------|-----------------------------|-------------------------------------------------------------------------------------------------------------------------|-------------------------------------|------------------------------------------------------------------------------------------------------------------------------------------|----------------------------------------------------------------------------------------------------------|
| 21       | Goggins 2012                    | 107505                      | Daily mean temperature (lag 0–13 days)                                                                                  | Poisson generalized additive models | Humidity, solar radiation, rainfall, air pressure, pollutants, flu consultation rates, day of week, holidays, time trend and seasonality | Statistically significant association between colder temperature and IS risk for below 22 °C temperature |
| 17       | Sobel 1987                      | 1306                        | Monthly mean temperature                                                                                                | Pearson correlation                 | N/A                                                                                                                                      | Statistically significant association between colder temperature and IS risk                             |
| 18       | Tsementzis 1991                 | 434                         | Monthly mean temperature                                                                                                | Linear regression                   | Humidity, pressure, rain, and sunshine                                                                                                   | Statistically non-significant association between colder temperature and IS risk                         |
| 3        | Feigin 2000                     | 1929                        | Daily mean temperature: low ( $\leq -2.0$ °C), mild ( $-1.9$ to $7.2$ °C) vs. high ( $\geq 7.3$ °C, reference variable) | Poisson regression                  | Season, geomagnetic, sun activity, and age                                                                                               | Statistically significant association between colder temperature and first IS risk                       |

**Table S3.** Studies included in systematic review of mean temperature and ischemic stroke (IS) by sex.

| Paper ID | Authors and Year of Publication | Number of IS Cases Reported | Temperature Variable Studied           | Statistical Analysis Method           | Variables Controlled for in the Model                                                                                                                             | Overall Conclusion                                                                                                                                        |
|----------|---------------------------------|-----------------------------|----------------------------------------|---------------------------------------|-------------------------------------------------------------------------------------------------------------------------------------------------------------------|-----------------------------------------------------------------------------------------------------------------------------------------------------------|
| 14       | Matsumoto 2010                  | 290                         | Daily mean temperature                 | Multilevel logistic regression        | Age, obesity, current smoking status, total cholesterol, systolic blood pressure, diabetes, and other meteorological parameters (including rainfall and sunlight) | Among women, statistically significant association between colder temperature and IS risk                                                                 |
| 16       | Shinkawa 1990                   | 223                         | Monthly mean temperature               | Stepwise multivariate regression      | Not reported                                                                                                                                                      | Among women, statistically significant association between colder temperature and IS risk                                                                 |
| 8        | Han 2015                        | 2202                        | Monthly mean temperature               | Poisson generalized linear regression | Temperature range, humidity, PM <sub>10</sub> and NO <sub>2</sub>                                                                                                 | Among men, statistically significant association between warmer temperature and IS risk                                                                   |
| 21       | Goggins 2012                    | 107505                      | Daily mean temperature (lag 0-13 days) | Poisson generalized additive models   | Humidity, solar radiation, rainfall, air pressure, pollutants, flu consultation rates, day of week, holidays, time trend and seasonality                          | Statistically significant association between colder temperature and IS risk below 22°C for both sex, however the association was stronger for female sex |

**Table S4.** Studies included in systematic review of ambient temperature and ischemic stroke (IS) by age.

| Paper ID | Authors and Year of Publication | Number of IS Cases Reported | Temperature Variable Studied           | Statistical Analysis Method                  | Variables Controlled for in the Model                                                                                                    | Overall Conclusion                                                                                                                                                 |
|----------|---------------------------------|-----------------------------|----------------------------------------|----------------------------------------------|------------------------------------------------------------------------------------------------------------------------------------------|--------------------------------------------------------------------------------------------------------------------------------------------------------------------|
| 19       | Wang 2009                       | 6743                        | Daily maximum and minimum temperature  | Generalized estimating equations (GEE) model | Humidity and air pollutants including PM <sub>10</sub> , NO <sub>2</sub> , O <sub>3</sub> and SO <sub>2</sub>                            | For aged≥65 in winter, statistically significant association between colder maximum temperature and IS admission                                                   |
| 8        | Han 2015                        | 2202                        | Monthly mean temperature               | Poisson generalized linear regression        | Temperature range, humidity, PM <sub>10</sub> and NO <sub>2</sub>                                                                        | For aged≥60, statistically significant association colder temperature and IS risk                                                                                  |
| 21       | Goggins 2012                    | 107505                      | Daily mean temperature (lag 0-13 days) | Poisson generalized additive models          | Humidity, solar radiation, rainfall, air pressure, pollutants, flu consultation rates, day of week, holidays, time trend and seasonality | As age increases, the association between colder temperature and IS risk becomes stronger, there was a particularly large jump in relative risk for those aged >85 |

**Table S5.** Studies included in systematic review of temperature change and ischemic stroke (IS).

| Paper ID | Authors and Year of Publication | Number of IS Cases Reported | Temperature Variable Studied                                                | Statistical Analysis Method     | Variables Controlled in the Model      | Overall Conclusion                                                                                                                   |
|----------|---------------------------------|-----------------------------|-----------------------------------------------------------------------------|---------------------------------|----------------------------------------|--------------------------------------------------------------------------------------------------------------------------------------|
| 2        | Dawson 2007                     | 5723                        | Daily change in mean temperature over preceding 24 h and 48 h               | Negative binomial model         | Study year, season and day of the week | Every 1 °C increase in mean temperature during the preceding 24 h was significantly associated with a 2.1% increase in IS admissions |
| 3        | Feigin 2000                     | 1929                        | Any change towards increasing or decreasing mean temperature vs. no change, | Poisson regression              | None (univariate model)                | No statistically significant association                                                                                             |
| 11       | Gomes 2014                      | 351                         | Daily maximum decrease in minimum temperature ≥2.4 °C vs. <2.4 °C           | Conditional logistic regression | Humidity and precipitation             | No statistically significant association                                                                                             |

|   |                    |       |                                                                       |                                       |                                                                                |                                                                         |
|---|--------------------|-------|-----------------------------------------------------------------------|---------------------------------------|--------------------------------------------------------------------------------|-------------------------------------------------------------------------|
| 6 | Magalhaes 2011     | 348   | Diurnal temperature range in previous 24 h, 7 and 14 days             | Poisson regression                    | Not reported                                                                   | No statistically significant association                                |
| 7 | Morabito 2011      | 45787 | Temperature difference in previous 24 h                               | Generalized linear model              | Years, seasons, days of the week, celebrations, summer decrement of population | Statistically significant association between larger change and IS risk |
| 8 | Han 2015           | 2202  | Diurnal temperature range (monthly)                                   | Poisson generalized linear regression | Temperature range, humidity, PM <sub>10</sub> and NO <sub>2</sub>              | No statistically significant association                                |
| 4 | Jimenez-Conde 2008 | 1043  | Variations of mean, minimum, and maximum temperature in previous 24 h | Logistic regression                   | Atmospheric pressure, humidity                                                 | No statistically significant association                                |

**Table S6.** Meta analysis for mean temperature and intracerebral hemorrhage (ICH).

| Paper ID | Authors and Year of Publication | Number of ICH Cases Reported | Statistical Analysis Method           | Variables Controlled in the Model                                              | Overall Conclusion                                                            |
|----------|---------------------------------|------------------------------|---------------------------------------|--------------------------------------------------------------------------------|-------------------------------------------------------------------------------|
| 2        | Dawson 2007                     | 666                          | Poisson regression                    | Study year, season and day of the week                                         | No statistically significant association                                      |
| 3        | Feigin 2000                     | 215                          | Poisson regression                    | None                                                                           | No statistically significant association                                      |
| 4        | Jimenez-Conde 2008              | 243                          | Logistic regression                   | Atmospheric pressure, humidity                                                 | No statistically significant association                                      |
| 8        | Han 2015                        | 799                          | Poisson generalized linear regression | Temperature range, humidity, PM <sub>10</sub> and NO <sub>2</sub>              | No statistically significant association                                      |
| 7        | Morabito 2011                   | 12478                        | Poisson generalized linear model      | Years, seasons, days of the week, celebrations, summer decrement of population | Statistically significant association between colder temperature and ICH risk |

**Table S7.** Studies only included in systematic review of mean temperature and intracerebral hemorrhage (ICH).

| Paper ID | Authors and Year of Publication | Number of ICH Cases Reported | Weather Parameter Studied                                                        | Analysis Model                               | Variables Controlled                                                              | Overall Conclusion                                                                        |
|----------|---------------------------------|------------------------------|----------------------------------------------------------------------------------|----------------------------------------------|-----------------------------------------------------------------------------------|-------------------------------------------------------------------------------------------|
| 9        | Chen 1995                       | 170                          | Daily mean temperature (>27.3 °C; 17.3–27.3 °C; <17.3 °C)                        | Linear regression model                      | Atmospheric pressure                                                              | Statistically significant association between colder temperature and ICH risk             |
| 16       | Shinkawa 1990                   | 51                           | Monthly mean temperature                                                         | Multiple linear regression                   | Not reported                                                                      | Statistically significant association between colder temperature and ICH risk             |
| 17       | Sobel 1987                      | 130                          | Monthly mean temperature                                                         | Pearson correlation                          | N/A                                                                               | Statistically significant association between colder temperature and ICH risk             |
| 10       | Fang 2012                       | 933                          | Monthly mean temperature and temperature range                                   | Linear regression model                      | Not reported                                                                      | Statistically significant association between colder temperature and ICH risk             |
| 3        | Feigin 2000                     | 215                          | Daily mean temperature: low (<−2.0 °C), mild (−1.9 to 7.2 °C) vs. high (>7.3 °C) | Poisson regression                           | Season, geomagnetic, sun activity, and age                                        | Statistically significant association between ICH occurrence and mild ambient temperature |
| 6        | Magalhaes 2011                  | 91                           | Daily minimum and maximum temperature in previous 7 and 14 days                  | Poisson regression                           | Not reported                                                                      | No statistically significant negative association                                         |
| 15       | Nakaguchi 2008                  | 164                          | Daily maximum and minimum temperature                                            | Mann-Whitney's U-test                        |                                                                                   | ICH tends to occur on days with lower maximum air temperature.                            |
| 19       | Wang 2009                       | 1835                         | Daily maximum and minimum temperature                                            | Generalized estimating equations (GEE) model | Humidity, PM <sub>10</sub> , NO <sub>2</sub> , O <sub>3</sub> and SO <sub>2</sub> | Statistically significant association between colder temperature with maximum temperature |
| 4        | Jimenez-Conde 2008              | 243                          | Mean, maximum and minimum temperature                                            | Logistic regression                          | Atmospheric pressure and humidity                                                 | No statistically significant association                                                  |

**Table S8.** Studies included in systematic review of mean temperature and intracerebral hemorrhage (ICH) by sex.

| Paper ID | Authors and Year of Publication | Number of ICH Cases Reported | Weather Parameter Studied | Analysis Model                        | Variables Controlled                                                                                                    | Overall Conclusion                                                                                        |
|----------|---------------------------------|------------------------------|---------------------------|---------------------------------------|-------------------------------------------------------------------------------------------------------------------------|-----------------------------------------------------------------------------------------------------------|
| 14       | Matsumoto 2010                  | 102                          | Daily mean temperature    | Multilevel logistic regression        | Age, obesity, smoking status, total cholesterol, systolic blood pressure, diabetes, and other meteorological parameters | Statistically significant association between colder temperature and ICH risk among females but not males |
| 16       | Shinkawa 1990                   | 51                           | Monthly mean temperature  | Stepwise multivariate analysis        | Not reported                                                                                                            | Statistically significant association between colder temperature and ICH risk among males but not females |
| 8        | Han 2015                        | 799                          | Monthly mean temperature  | Poisson generalized linear regression | Temperature range, humidity, PM <sub>10</sub> and NO <sub>2</sub>                                                       | No statistically significant association                                                                  |

**Table S9.** Studies included in systematic review of ambient temperature and intracerebral hemorrhage (ICH) by age.

| Paper ID | Authors and Year of Publication | Number of ICH Cases Reported | Weather Parameter Studied             | Analysis Model                               | Variables Controlled                                                           | Overall Conclusion                                                                                                                         |
|----------|---------------------------------|------------------------------|---------------------------------------|----------------------------------------------|--------------------------------------------------------------------------------|--------------------------------------------------------------------------------------------------------------------------------------------|
| 19       | Wang 2009                       | 1835                         | Daily maximum and minimum temperature | Generalized estimating equations (GEE) model | Humidity and air pollutants                                                    | Statistically significant association between ICH risk and colder maximum temperatures in patients aged ≥65 and for patients <65 in summer |
| 7        | Morabito 2011                   | 12478                        | Daily mean temperature                | Poisson generalized linear model             | Years, seasons, days of the week, celebrations, summer decrement of population | Statistically significant association between colder temperature and ICH risk among patients ≥65                                           |
| 8        | Han 2015                        | 799                          | Monthly mean temperature              | Poisson generalized linear regression        | Temperature range, humidity, PM <sub>10</sub> and NO <sub>2</sub>              | Statistically significant association between colder temperature and ICH risk among aged ≥60                                               |

**Table S10.** Studies included in systematic review of temperature change and intracerebral hemorrhage (ICH).

| Paper ID | Authors and Year of Publication | Number of ICH Cases Reported | Weather Parameter Studied                                                       | Analysis Model                        | Variables Controlled                                                           | Overall Conclusion                                                                       |
|----------|---------------------------------|------------------------------|---------------------------------------------------------------------------------|---------------------------------------|--------------------------------------------------------------------------------|------------------------------------------------------------------------------------------|
| 10       | Fang 2012                       | 933                          | Monthly temperature fluctuation                                                 | Linear regression model               | None                                                                           | Statistically significant association between larger change and ICH risk                 |
| 3        | Feigin 2000                     | 215                          | Daily change in mean temperature towards increasing or decreasing vs. no change | Poisson regression                    | Season, geomagnetic, sun activity, and age                                     | No statistically significant association                                                 |
| 11       | Gomes 2014                      | 242                          | Daily maximum decrease in minimum temperature $\geq 2.4$ °C vs. $< 2.4$ °C      | Conditional logistic regression       | Humidity and precipitation                                                     | Statistically significant association between larger change and ICH risk                 |
| 6        | Magalhaes 2011                  | 91                           | Diurnal temperature range in previous 24 h, 7 and 14 days                       | Poisson regression                    | N/A                                                                            | Statistically significant association with larger temperature range in the previous 24 h |
| 16       | Shinkawa 1990                   | 51                           | Intradiurnal temperature                                                        | Stepwise multivariate analysis        | Not reported                                                                   | Statistically significant association between larger change and ICH risk                 |
| 8        | Han 2015                        | 799                          | Diurnal temperature range                                                       | Poisson generalized linear regression | Temperature range, humidity, PM <sub>10</sub> and NO <sub>2</sub>              | No statistically significant association                                                 |
| 7        | Morabito 2011                   | 12478                        | Temperature change in the previous 24 h                                         | Poisson generalized linear model      | Years, seasons, days of the week, celebrations, summer decrement of population | No statistically significant association                                                 |
| 4        | Jimenez-Conde 2008              | 243                          | Mean, maximum and minimum temperature variation in the previous 24 h            | Logistic regression                   | Atmospheric pressure and humidity                                              | No statistically significant association                                                 |

**Table S11.** studies for mean temperature and subarachnoid hemorrhage (SAH).

| Paper ID | Authors and Year of Publication | Number of SAH Cases Reported | Temperature Variable Studied               | Statistical Analysis Method                    | Variables Controlled in the Model          | Overall Conclusion                                                            |
|----------|---------------------------------|------------------------------|--------------------------------------------|------------------------------------------------|--------------------------------------------|-------------------------------------------------------------------------------|
| 1        | Abe 2008                        | 1729                         | Hourly mean temperature                    | Autoregressive integrated moving average model | Atmospheric pressure, humidity             | Statistically significant association between colder temperature and SAH risk |
| 3        | Feigin 2000                     | 64                           | Daily mean temperature                     | Poisson regression                             | Season, geomagnetic, sun activity, and age | No statistically association                                                  |
| 12       | Lai 2014                        | 16970                        | Daily mean temperature                     | Linear regression                              | Sex                                        | Statistically significant association between warmer temperature and SAH risk |
| 20       | Oyoshi 1999                     | 210                          | Monthly mean, maximum, minimum temperature | Pearson correlation                            | N/A                                        | No statistically significant association                                      |
| 18       | Tsementzis 1991                 | 430                          | Monthly mean temperature                   | Linear regression                              | Humidity, pressure, rain, and sunshine     | No statistically significant association                                      |

**Table S12.** Studies included in systematic review of ambient temperature and subarachnoid hemorrhage (SAH).

| Paper ID | Authors and Year of Publication | Number of SAH Cases Reported | Temperature Variable Studied                                                                                                    | Statistical Analysis Method | Variables Controlled in the Model                    | Overall Conclusion                                                                   |
|----------|---------------------------------|------------------------------|---------------------------------------------------------------------------------------------------------------------------------|-----------------------------|------------------------------------------------------|--------------------------------------------------------------------------------------|
| 3        | Feigin 2000                     | 64                           | Low (<-2.0), mild (-1.9 to 7.2) vs. high (>7.3) mean temperature.<br>Any change towards increasing or decreasing vs. no change, | Poisson regression          | Season, geomagnetic, sun activity, and age           | No statistically significant association                                             |
| 13       | Lejeune, 1994                   | 283                          | Reduction of 1 of maximal temperature on the day of SAH; reduction of 1 of maximal temperature on the day before SAH            | Logistic regression         | Atmospheric pressure, humidity and sunshine duration | Statistically significant association between larger temperature change and SAH risk |

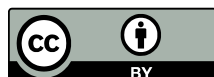

© 2016 by the authors; licensee MDPI, Basel, Switzerland. This article is an open access article distributed under the terms and conditions of the Creative Commons by Attribution (CC-BY) license (<http://creativecommons.org/licenses/by/4.0/>).
